# Supplementary material for: Awareness and use of genetic testing: An analysis of the Health Information National Trends Survey 2020
Source: PubMed Central journal article supplement (PMC9746668; doi:10.1016/j.gim.2022.08.023), 2022-09-22
Supplement: NIHMS1841636-supplement-1.pdf [file NIHMS1841636-supplement-1.pdf]

Supplementary Table I. Demographic characteristics for HINTS 5 Cycle 4 Respondents with weighted and unweighted percentages ( $N = 3,767$ ).

| Characteristic                                                | <i>n</i> | Weighted <sup>a</sup> % | Unweighted % |
|---------------------------------------------------------------|----------|-------------------------|--------------|
| <b>Sex</b>                                                    |          |                         |              |
| Male                                                          | 1,561    | 49                      | 41           |
| Female                                                        | 2,206    | 51                      | 59           |
| <b>Age</b>                                                    |          |                         |              |
| 18-34                                                         | 500      | 26                      | 13           |
| 35-49                                                         | 722      | 26                      | 19           |
| 50-64                                                         | 1,152    | 28                      | 31           |
| 65-74                                                         | 862      | 12                      | 23           |
| 75 and above                                                  | 531      | 8                       | 14           |
| <b>Race</b>                                                   |          |                         |              |
| Non-Hispanic White                                            | 2,268    | 63                      | 60           |
| Non-Hispanic Black                                            | 569      | 12                      | 15           |
| Non-Hispanic Asian                                            | 174      | 5                       | 5            |
| Non-Hispanic American Indian, Alaska Native, Pacific Islander | 29       | 1                       | 1            |
| Non-Hispanic Multiracial                                      | 108      | 2                       | 3            |
| Hispanic                                                      | 619      | 16                      | 16           |
| <b>Level of Education</b>                                     |          |                         |              |
| High School or less                                           | 1,014    | 30                      | 26           |
| Some College                                                  | 2,851    | 70                      | 74           |
| <b>Employment Status<sup>b</sup></b>                          |          |                         |              |
| Employed                                                      | 1,852    | 59                      | 51           |
| Retired                                                       | 1,165    | 19                      | 32           |
| Disabled                                                      | 201      | 5                       | 6            |
| Other                                                         | 298      | 12                      | 8            |
| Not Employed                                                  | 130      | 4                       | 4            |
| <b>Health Insurance Status</b>                                |          |                         |              |
| Insured                                                       | 3,568    | 91                      | 95           |
| Not Insured                                                   | 199      | 9                       | 5            |
| <b>Income<sup>c</sup></b>                                     |          |                         |              |
| Less than \$20,000                                            | 609      | 15                      | 18           |
| \$20,000 to \$49,999                                          | 890      | 24                      | 26           |
| \$50,000 to \$99,999                                          | 982      | 31                      | 29           |
| \$100,000 or more                                             | 909      | 30                      | 27           |
| <b>Marital Status</b>                                         |          |                         |              |
| Married                                                       | 2,010    | 55                      | 53           |
| Other <sup>d</sup>                                            | 1,104    | 14                      | 29           |
| Never Married                                                 | 653      | 31                      | 17           |
| <b>Personal History of Cancer</b>                             |          |                         |              |
| Yes                                                           | 462      | 7                       | 12           |
| <i>Breast Cancer</i>                                          | 105      | 19                      | 23           |
| <i>Prostate Cancer</i>                                        | 84       | 9                       | 18           |
| <i>Other<sup>e</sup></i>                                      | 275      | 72                      | 59           |
| No                                                            | 3,305    | 93                      | 88           |
| <b>Family History of Cancer<sup>c</sup></b>                   |          |                         |              |
| Yes                                                           | 2,630    | 70                      | 72           |

|          |     |    |    |
|----------|-----|----|----|
| No       | 720 | 22 | 20 |
| Not Sure | 308 | 8  | 8  |

<sup>a</sup> Weighted percentages. These were calculated using jackknife replication.

<sup>b</sup> Participants who reported being employed full or part time were categorized as “employed”. Participants who were retired, disabled, students, homemakers or other were categorized as “not employed.”  $n = 121$  participants were missing responses for employment.

<sup>c</sup>  $n = 377$  participants were missing for income and 109 were missing responses for family history of cancer.

<sup>d</sup> The “other” category included participants who were widowed, divorced, or separated.

<sup>e</sup> Participants belonging to the “other” cancer type category included those with bladder cancer, bone cancer, cervical cancer, colon cancer, endometrial cancer, head/neck cancer, Hodgkin’s Lymphoma, renal cancer, leukemia, liver cancer, lung cancer, non-Hodgkin’s, oral cancer, ovarian cancer, pancreatic cancer, pharyngeal cancer, rectal cancer, melanoma, or another type of cancer.
